# Supplementary material
Source: MDPI journal article supplement (https://www.mdpi.com/2073-8994/16/5/524)
Supplement: s1 [file s1 › symmetry-2956397-supplementary.pdf]

Supplementary Materials

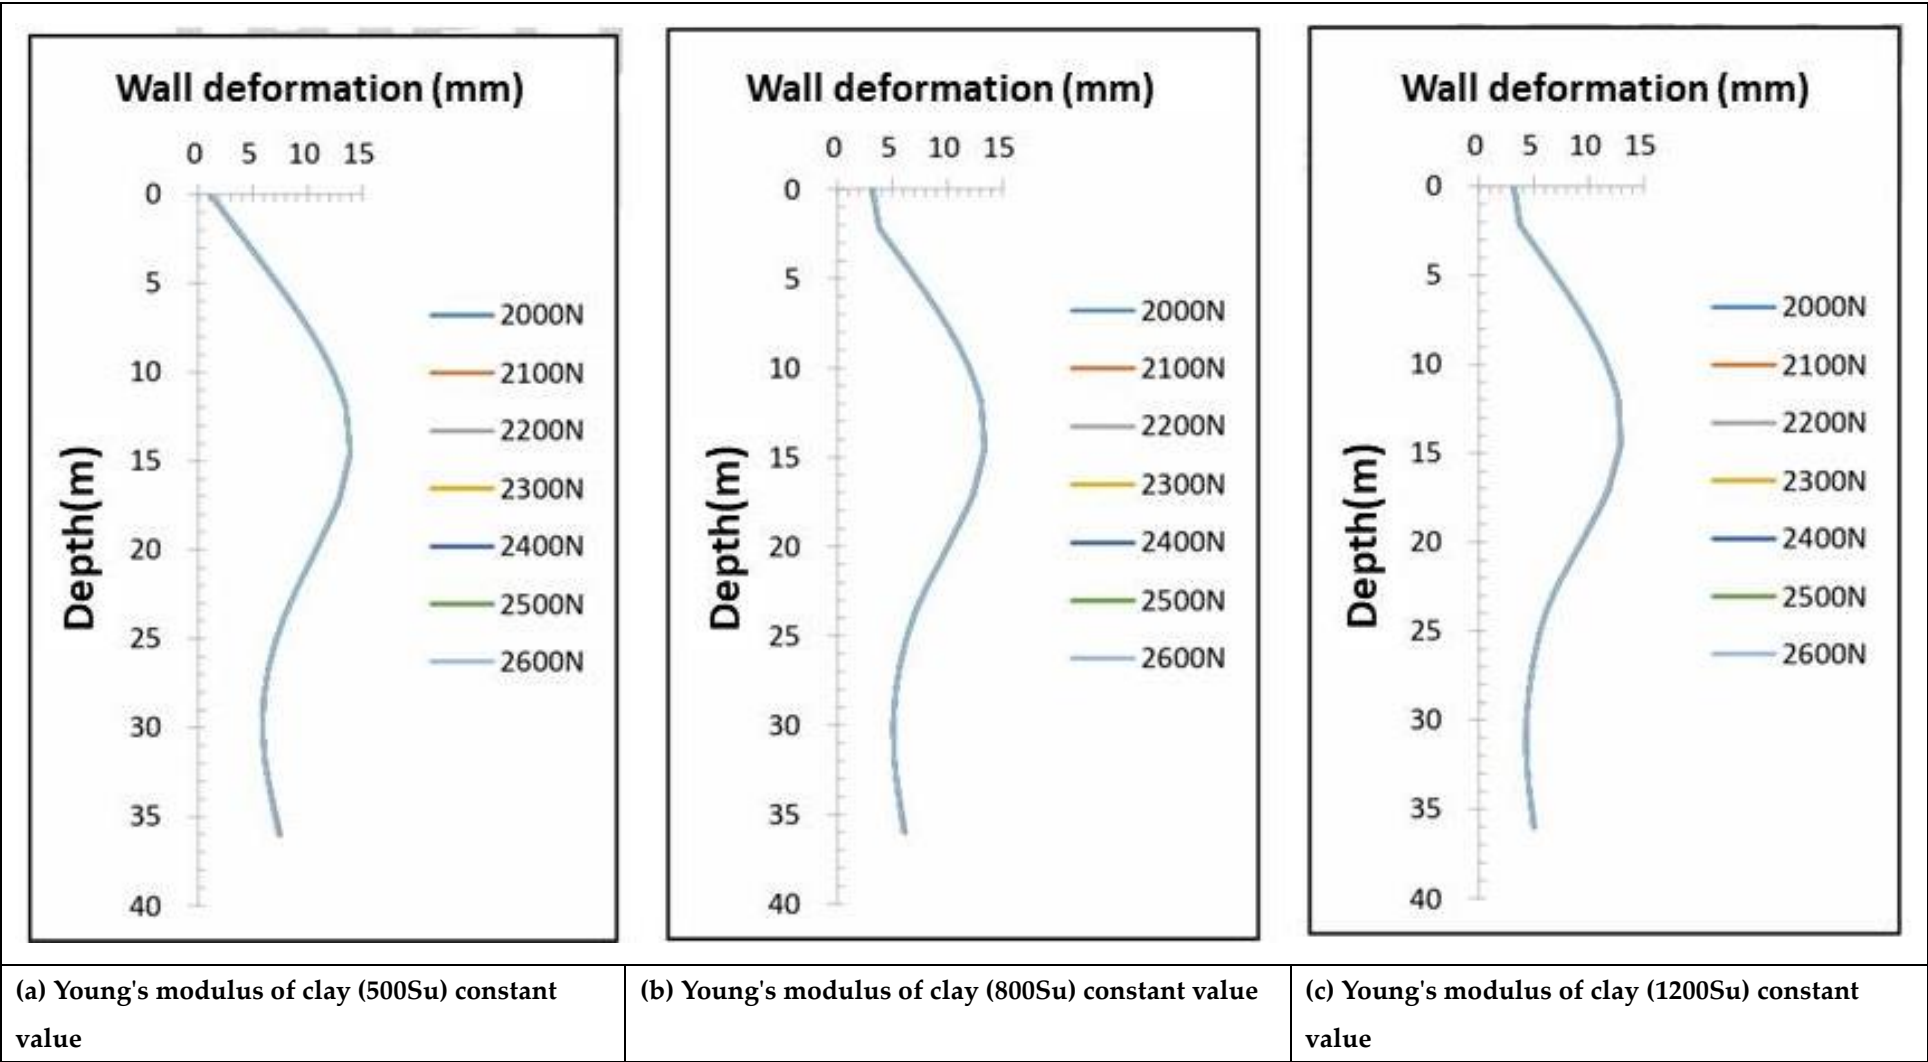

Figure S1 MC model, comparison of results with changes in sand's Young's modulus

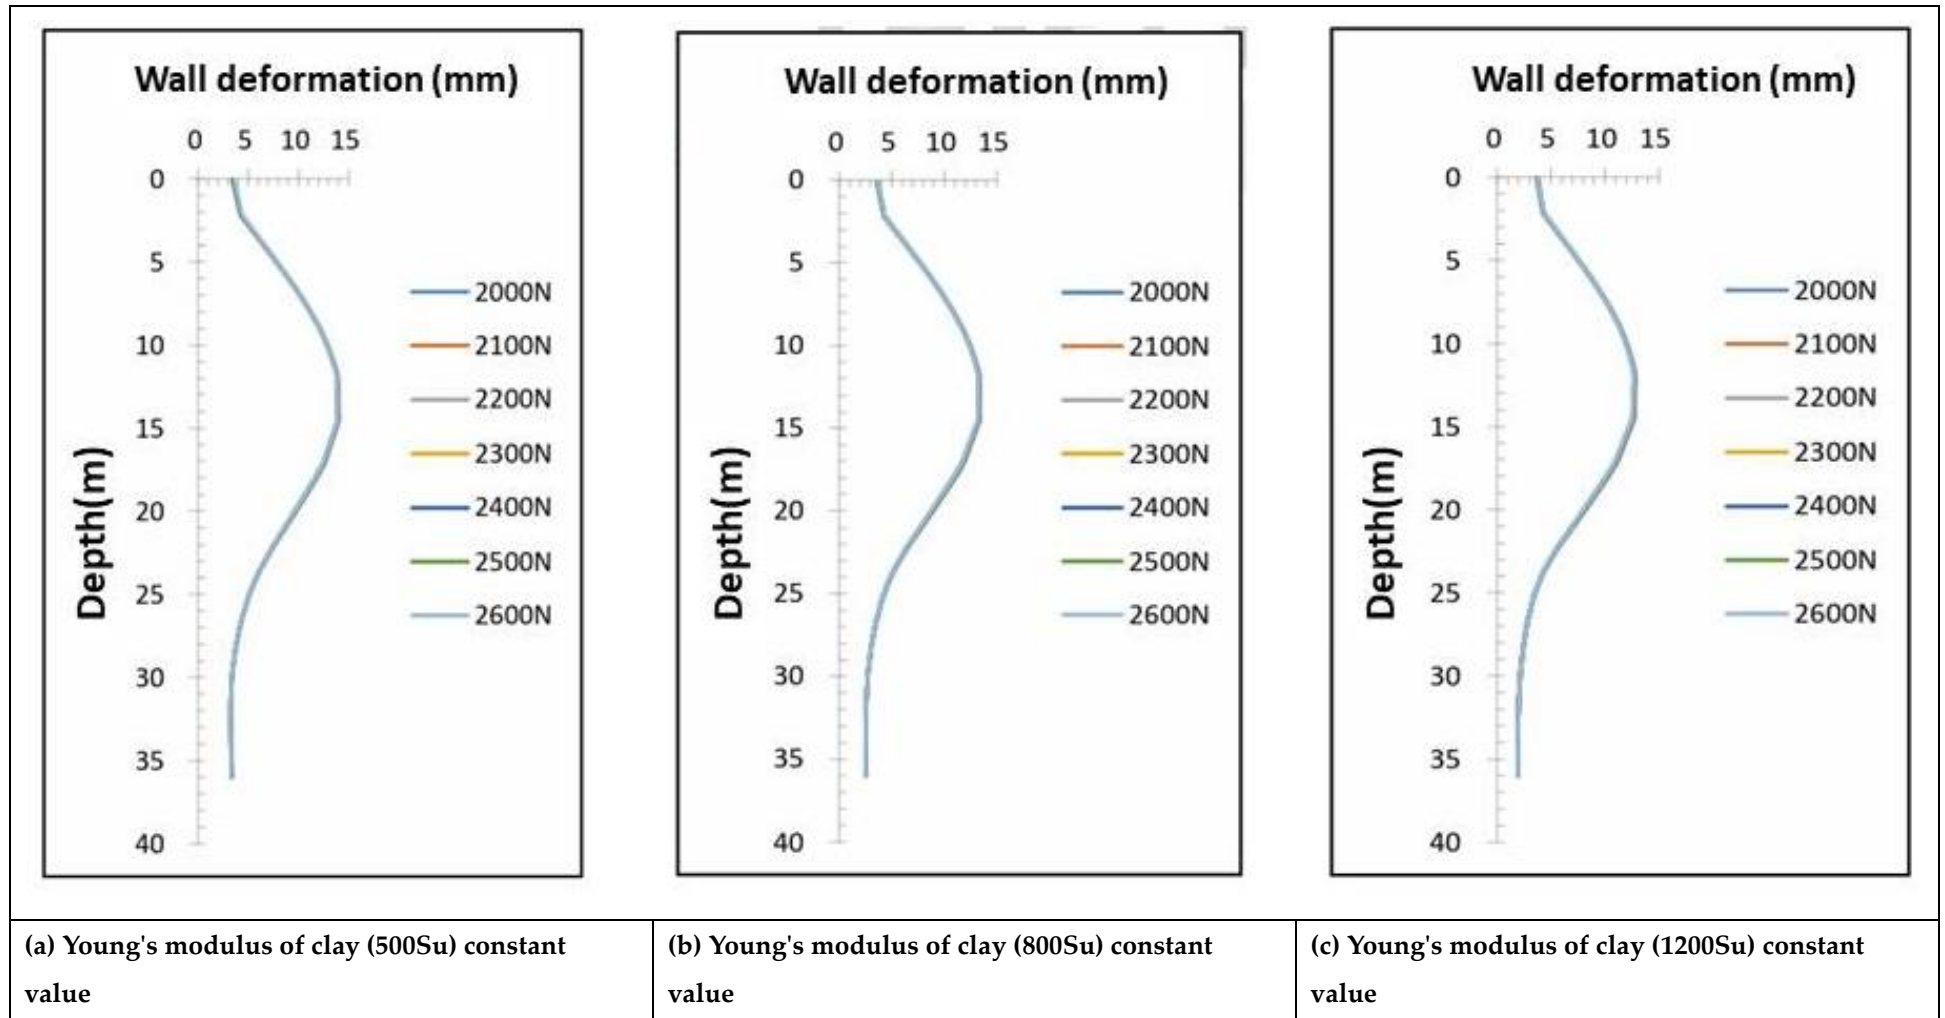

**Figure S2** HS model, comparison of results with changes in sand's Young's modulus

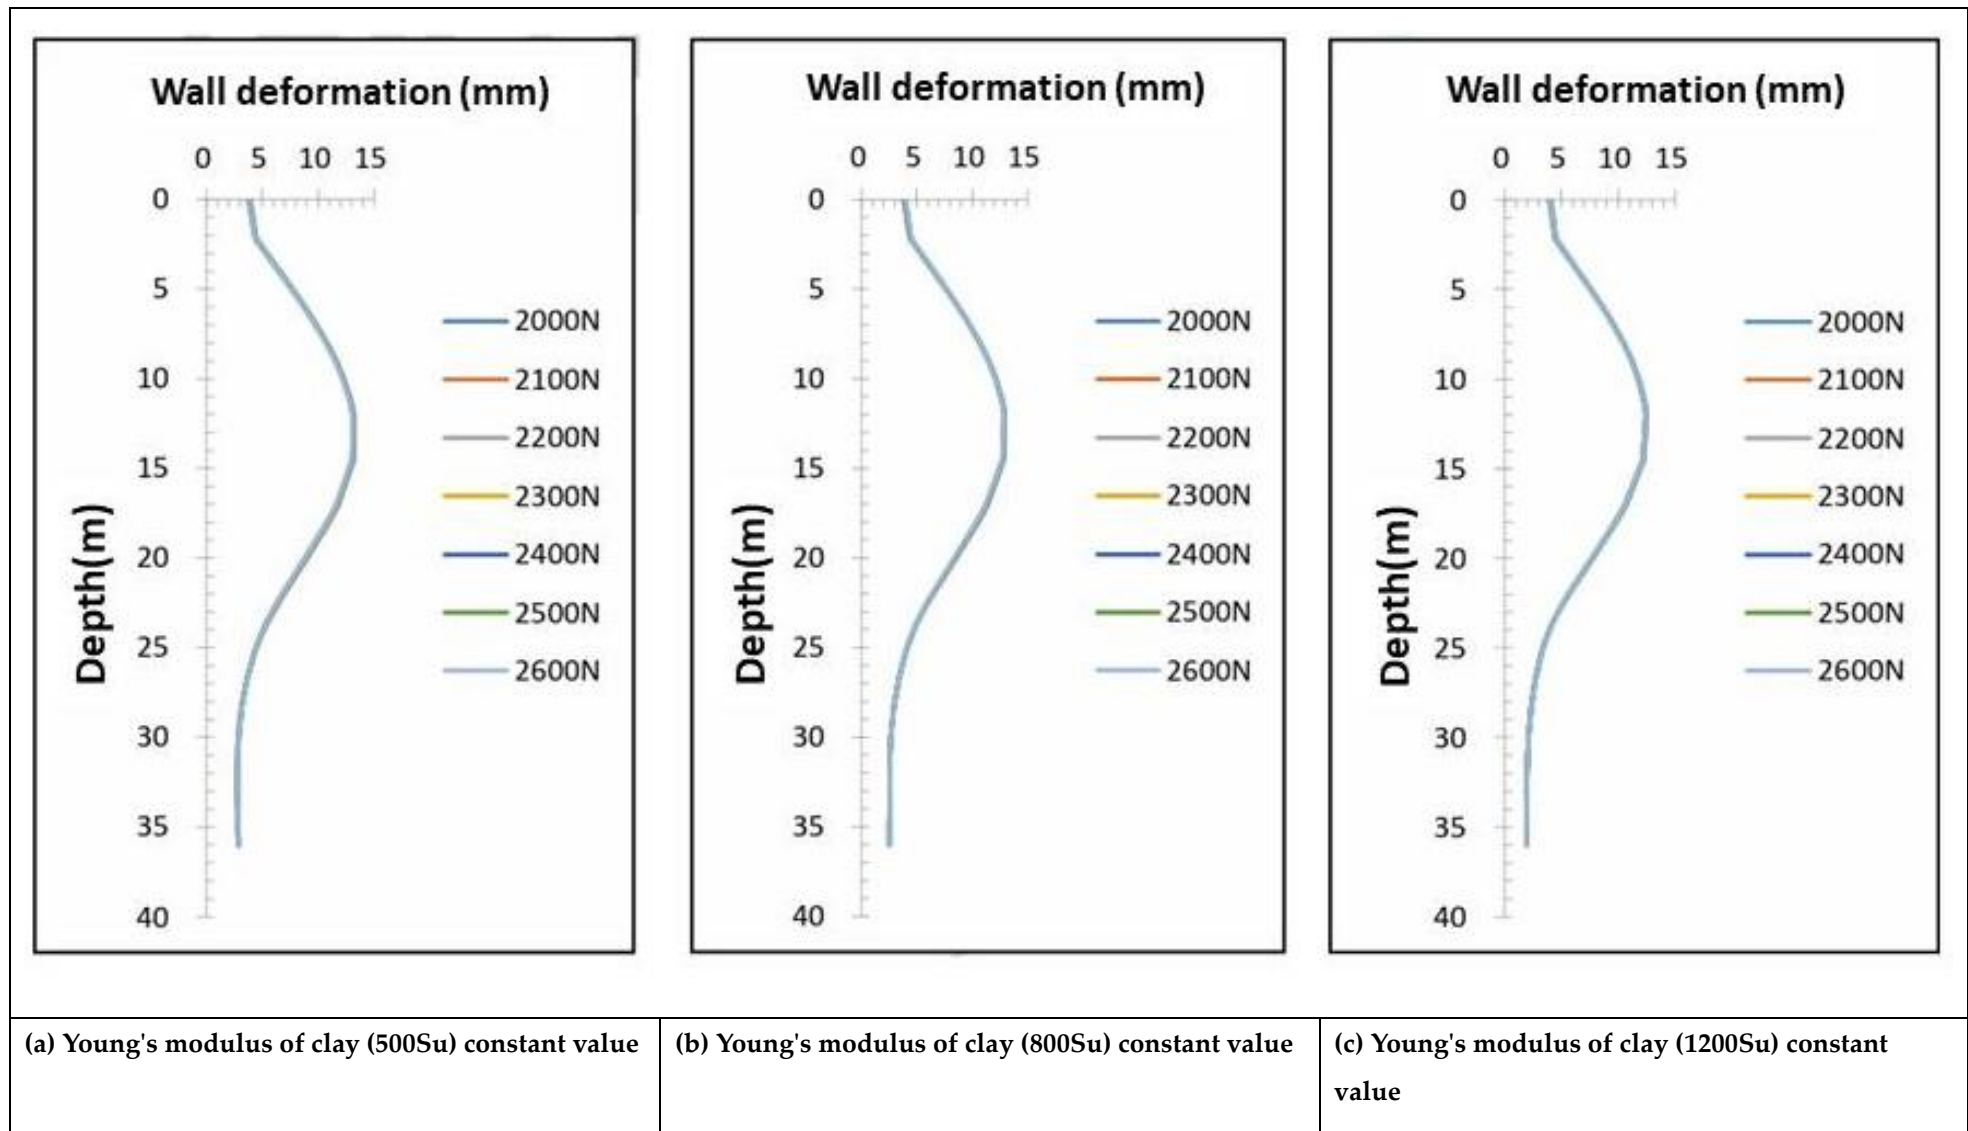

**Figure S3** HSS model, comparison of results with changes in sand's Young's modulus

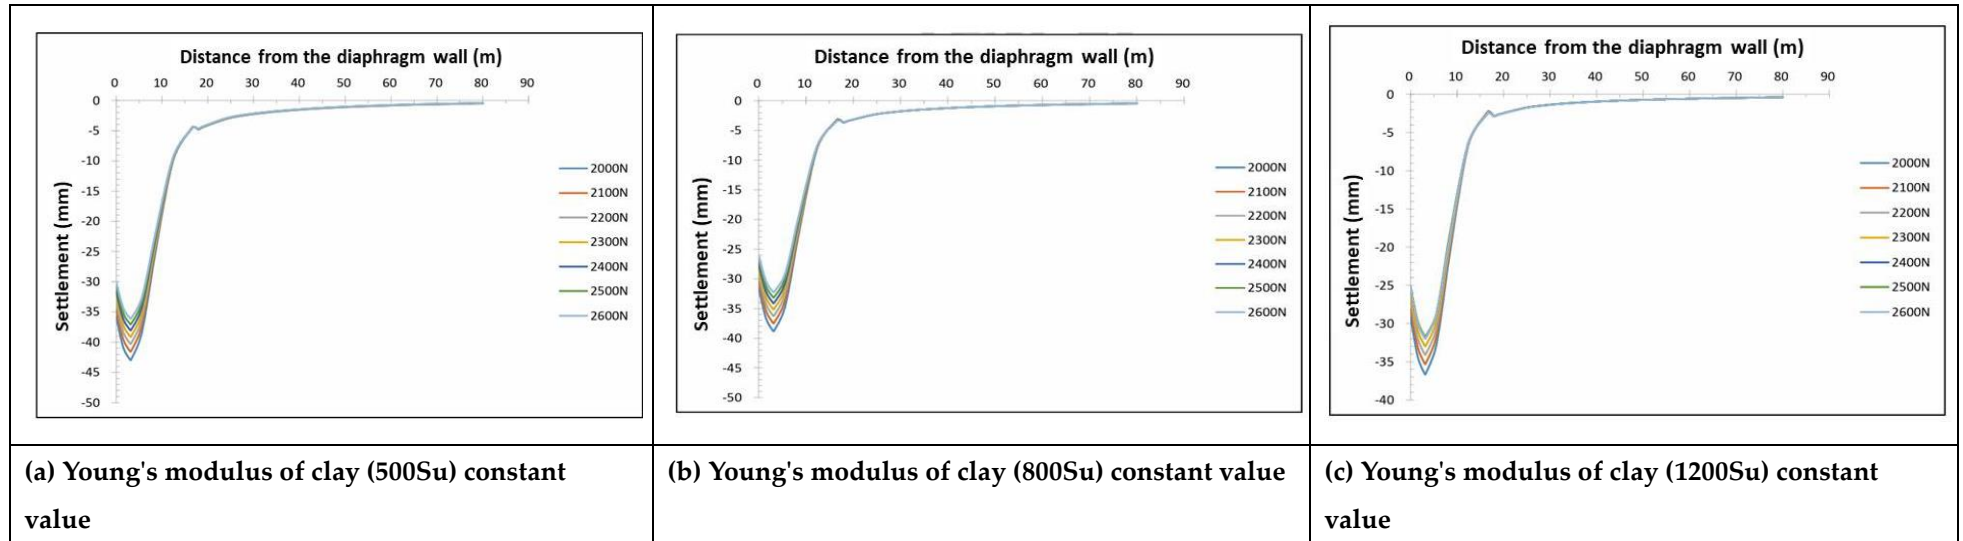

Figure S4 MC model, comparison of results with changes in sand's Young's modulus

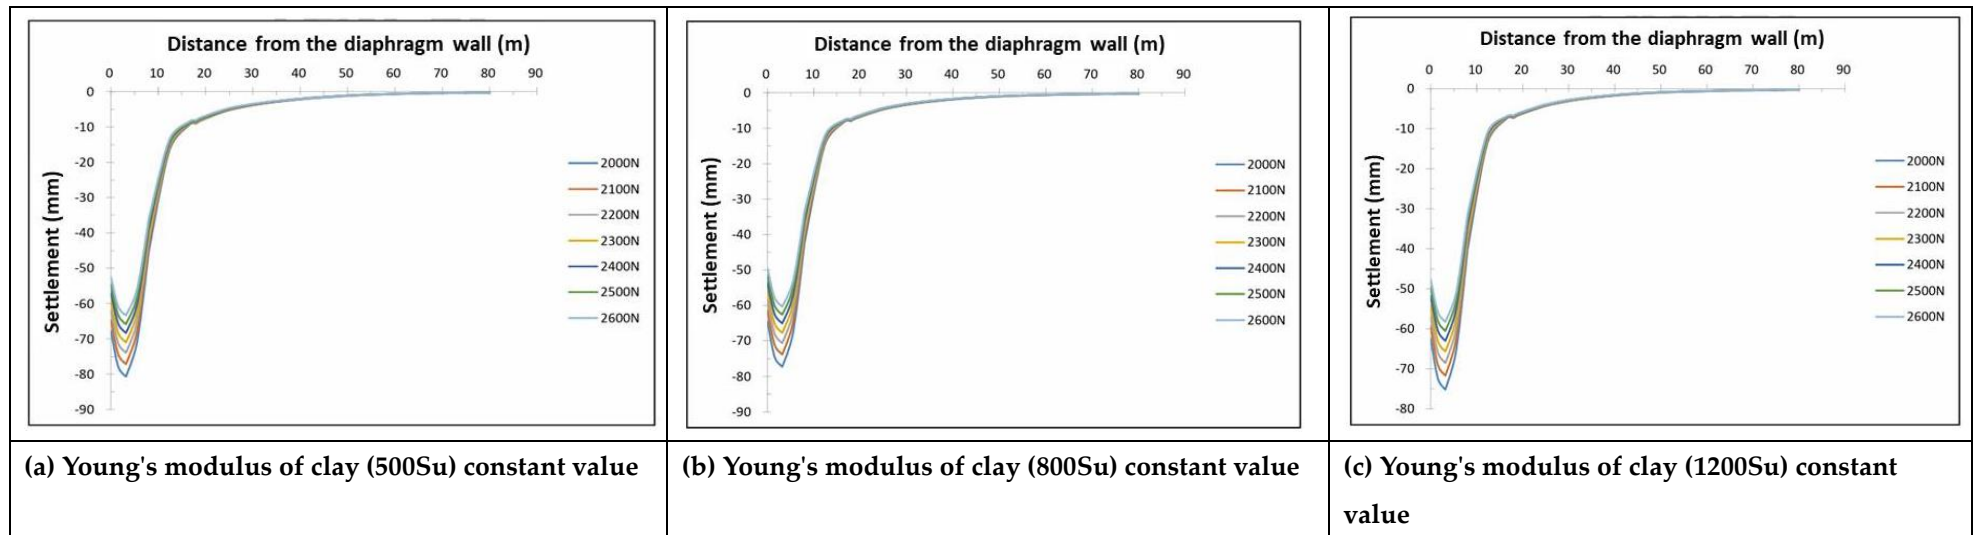

Figure S5 HS model, comparison of results with changes in sand's Young's modulus

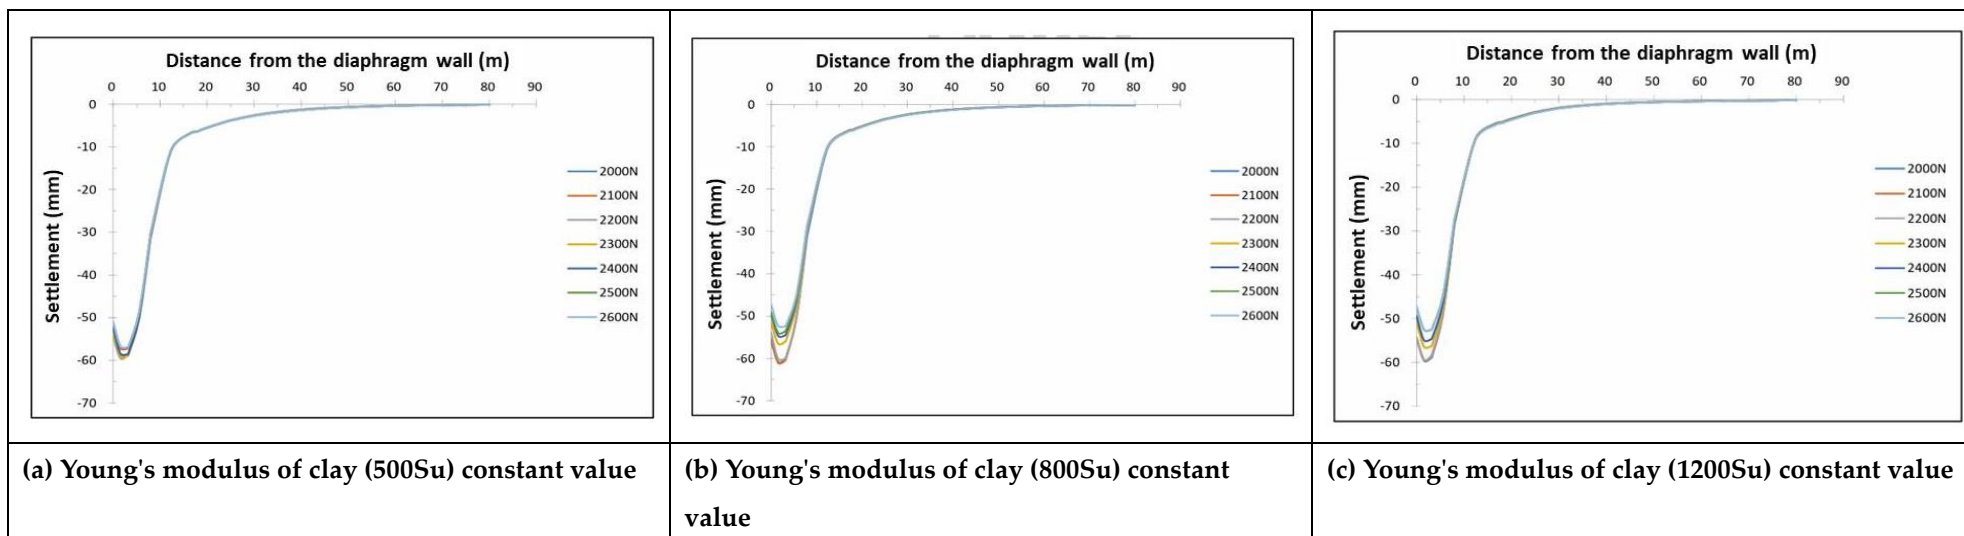

**Figure S6** HSS model, comparison of results with changes in sand's Young's modulus
